# Supplementary material for: Healthcare utilization and costs of cardiopulmonary complications following cardiac surgery in the United States
Source: PLoS One. 2019 Dec 19;14(12):e0226750. doi: 10.1371/journal.pone.0226750 (PMC6922411; doi:10.1371/journal.pone.0226750)
Supplement: S1 File — Supplementary Tables A-G. The supplementary tables file contains a list of all ICD- 9 and 10 codes used in the analysis. (XLSX) [file pone.0226750.s001.xlsx]

## Sheet: Table A
CODE	TYPE	DESCRIPTION	Surgical Category	CODE_TYPE
36.1	ICD9	BYPASS ANASTOMOSIS FOR HEART REVASCULARIZATION	CABG	Procedure
36.10	ICD9	AORTOCORONARY BYPASS FOR HEART REVASCULARIZATION, NOT OTHERWISE SPECIFIED	CABG	Procedure
36.11	ICD9	(AORTO)CORONARY BYPASS OF ONE CORONARY ARTERY	CABG	Procedure
36.12	ICD9	(AORTO)CORONARY BYPASS OF TWO CORONARY ARTERIES	CABG	Procedure
36.13	ICD9	(AORTO)CORONARY BYPASS OF THREE CORONARY ARTERIES	CABG	Procedure
36.14	ICD9	(AORTO)CORONARY BYPASS OF FOUR OR MORE CORONARY ARTERIES	CABG	Procedure
36.15	ICD9	SINGLE INTERNAL MAMMARY-CORONARY ARTERY BYPASS	CABG	Procedure
36.16	ICD9	DOUBLE INTERNAL MAMMARY-CORONARY ARTERY BYPASS	CABG	Procedure
36.17	ICD9	ABDOMINAL - CORONARY ARTERY BYPASS	CABG	Procedure
36.19	ICD9	OTHER BYPASS ANASTOMOSIS FOR HEART REVASCULARIZATION	CABG	Procedure
33510	CPT	Coronary artery bypass, vein only; single coronary venous graft	CABG	Procedure
33511	CPT	Coronary artery bypass, vein only; 2 coronary venous grafts	CABG	Procedure
33512	CPT	Coronary artery bypass, vein only; 3 coronary venous grafts	CABG	Procedure
33513	CPT	Coronary artery bypass, vein only; 4 coronary venous grafts	CABG	Procedure
33514	CPT	Coronary artery bypass, vein only; 5 coronary venous grafts	CABG	Procedure
33516	CPT	Coronary artery bypass, vein only; 6 or more coronary venous grafts	CABG	Procedure
33517	CPT	Coronary artery bypass, using venous graft(s) and arterial graft(s); single vein graft	CABG	Procedure
33518	CPT	Coronary artery bypass, using venous graft(s) and arterial graft(s); 2 venous grafts	CABG	Procedure
33519	CPT	Coronary artery bypass, using venous graft(s) and arterial graft(s); 3 venous grafts	CABG	Procedure
33521	CPT	Coronary artery bypass, using venous graft(s) and arterial graft(s); 4 venous grafts	CABG	Procedure
33522	CPT	Coronary artery bypass, using venous graft(s) and arterial graft(s); 5 venous grafts	CABG	Procedure
33523	CPT	Coronary artery bypass, using venous graft(s) and arterial graft(s); 6 or more venous grafts	CABG	Procedure
33533	CPT	Coronary artery bypass, using arterial graft(s); single arterial graft	CABG	Procedure
33534	CPT	Coronary artery bypass, using arterial graft(s); 2 coronary arterial grafts	CABG	Procedure
33535	CPT	Coronary artery bypass, using arterial graft(s); 3 coronary arterial grafts	CABG	Procedure
33536	CPT	Coronary artery bypass, using arterial graft(s); 4 or more coronary arterial grafts	CABG	Procedure
33572	CPT	Coronary endarterectomy, open, any method, of left anterior descending, circumflex, or right coronary artery performed in conjunction with coronary artery bypass graft procedure, each vessel	CABG	Procedure
35.0	ICD9	CLOSED HEART VALVOTOMY OR TRANSCATHETER REPLACEMENT OF HEART VALVE	VALVE	Procedure
35.05	ICD9	ENDOVASCULAR REPLACEMENT OF AORTIC VALVE	VALVE	Procedure
35.06	ICD9	TRANSAPICAL REPLACEMENT OF AORTIC VALVE	VALVE	Procedure
35.07	ICD9	ENDOVASCULAR REPLACEMENT OF PULMONARY VALVE	VALVE	Procedure
35.08	ICD9	TRANSAPICAL REPLACEMENT OF PULMONARY VALVE	VALVE	Procedure
35.09	ICD9	ENDOVASCULAR REPLACEMENT OF UNSPECIFIED HEART VALVE	VALVE	Procedure
35.1	ICD9	OPEN HEART VALVULOPLASTY WITHOUT REPLACEMENT	VALVE	Procedure
35.10	ICD9	OPEN HEART VALVULOPLASTY WITHOUT REPLACEMENT, UNSPECIFIED VALVE	VALVE	Procedure
35.11	ICD9	OPEN HEART VALVULOPLASTY OF AORTIC VALVE WITHOUT REPLACEMENT	VALVE	Procedure
35.12	ICD9	OPEN HEART VALVULOPLASTY OF MITRAL VALVE WITHOUT REPLACEMENT	VALVE	Procedure
35.13	ICD9	OPEN HEART VALVULOPLASTY OF PULMONARY VALVE WITHOUT REPLACEMENT	VALVE	Procedure
35.14	ICD9	OPEN HEART VALVULOPLASTY OF TRICUSPID VALVE WITHOUT REPLACEMENT	VALVE	Procedure
35.2	ICD9	OPEN AND OTHER REPLACEMENT OF HEART VALVE	VALVE	Procedure
35.20	ICD9	OPEN AND OTHER REPLACEMENT OF UNSPECIFIED HEART VALVE	VALVE	Procedure
35.21	ICD9	OPEN AND OTHER REPLACEMENT OF AORTIC VALVE WITH TISSUE GRAFT	VALVE	Procedure
35.22	ICD9	OPEN AND OTHER REPLACEMENT OF AORTIC VALVE	VALVE	Procedure
35.23	ICD9	OPEN AND OTHER REPLACEMENT OF MITRAL VALVE WITH TISSUE GRAFT	VALVE	Procedure
35.24	ICD9	OPEN AND OTHER REPLACEMENT OF MITRAL VALVE	VALVE	Procedure
35.25	ICD9	OPEN AND OTHER REPLACEMENT OF PULMONARY VALVE WITH TISSUE GRAFT	VALVE	Procedure
35.26	ICD9	OPEN AND OTHER REPLACEMENT OF PULMONARY VALVE	VALVE	Procedure
35.27	ICD9	OPEN AND OTHER REPLACEMENT OF TRICUSPID VALVE WITH TISSUE GRAFT	VALVE	Procedure
35.28	ICD9	OPEN AND OTHER REPLACEMENT OF TRICUSPID VALVE	VALVE	Procedure
35.3	ICD9	OPERATIONS ON STRUCTURES ADJACENT TO HEART VALVES	VALVE	Procedure
35.31	ICD9	OPERATIONS ON PAPILLARY MUSCLE	VALVE	Procedure
35.32	ICD9	OPERATIONS ON CHORDAE TENDINEAE	VALVE	Procedure
35.33	ICD9	ANNULOPLASTY	VALVE	Procedure
35.97	ICD9	PERCUTANEOUS MITRAL VALVE REPAIR WITH IMPLANT	VALVE	Procedure
35.99	ICD9	OTHER OPERATIONS ON VALVES OF HEART	VALVE	Procedure
33361	CPT	Transcatheter aortic valve replacement (TAVR/TAVI) with prosthetic valve; percutaneous femoral artery approach	VALVE	Procedure
33362	CPT	Transcatheter aortic valve replacement (TAVR/TAVI) with prosthetic valve; open femoral artery approach	VALVE	Procedure
33363	CPT	Transcatheter aortic valve replacement (TAVR/TAVI) with prosthetic valve; open axillary artery approach	VALVE	Procedure
33364	CPT	Transcatheter aortic valve replacement (TAVR/TAVI) with prosthetic valve; open iliac artery approach	VALVE	Procedure
33365	CPT	Transcatheter aortic valve replacement (TAVR/TAVI) with prosthetic valve; transaortic approach (eg, median sternotomy, mediastinotomy)	VALVE	Procedure
33366	CPT	Transcatheter aortic valve replacement (TAVR/TAVI) with prosthetic valve; transapical exposure (eg, left thoracotomy)	VALVE	Procedure
33367	CPT	Transcatheter aortic valve replacement (TAVR/TAVI) with prosthetic valve; cardiopulmonary bypass support with percutaneous peripheral arterial and venous cannulation (eg, femoral vessels)	VALVE	Procedure
33368	CPT	Transcatheter aortic valve replacement (TAVR/TAVI) with prosthetic valve; cardiopulmonary bypass support with open peripheral arterial and venous cannulation (eg, femoral, iliac, axillary vessels)	VALVE	Procedure
33369	CPT	Transcatheter aortic valve replacement (TAVR/TAVI) with prosthetic valve; cardiopulmonary bypass support with central arterial and venous cannulation (eg, aorta, right atrium, pulmonary artery)	VALVE	Procedure
33403	CPT	Valvuloplasty, aortic valve; using transventricular dilation, with cardiopulmonary bypass	VALVE	Procedure
33405	CPT	Replacement, aortic valve, with cardiopulmonary bypass; with prosthetic valve, other than homograft or stentless valve	VALVE	Procedure
33406	CPT	Replacement, aortic valve, with cardiopulmonary bypass; with allograft valve (freehand)	VALVE	Procedure
33410	CPT	Replacement, aortic valve, with cardiopulmonary bypass; with stentless tissue valve	VALVE	Procedure
33411	CPT	Replacement, aortic valve; with aortic annulus enlargement, noncoronary sinus	VALVE	Procedure
33412	CPT	Replacement, aortic valve; with transventricular aortic annulus enlargement (Konno procedure)	VALVE	Procedure
33413	CPT	Replacement, aortic valve; by translocation of autologous pulmonary valve with allograft replacement of pulmonary valve (Ross procedure)	VALVE	Procedure
33415	CPT	Resection or incision of subvalvular tissue for discrete subvalvular aortic stenosis	VALVE	Procedure
33422	CPT	Valvotomy, mitral valve; open heart, with cardiopulmonary bypass	VALVE	Procedure
33425	CPT	Valvuloplasty, mitral valve, with cardiopulmonary bypass	VALVE	Procedure
33426	CPT	Valvuloplasty, mitral valve, with cardiopulmonary bypass; with prosthetic ring	VALVE	Procedure
33427	CPT	Valvuloplasty, mitral valve, with cardiopulmonary bypass; radical reconstruction, with or without ring	VALVE	Procedure
33430	CPT	Replacement, mitral valve, with cardiopulmonary bypass	VALVE	Procedure
33460	CPT	Valvectomy, tricuspid valve, with cardiopulmonary bypass	VALVE	Procedure
33465	CPT	Replacement, tricuspid valve, with cardiopulmonary bypass	VALVE	Procedure
33468	CPT	Tricuspid valve repositioning and plication for Ebstein anomaly	VALVE	Procedure
33472	CPT	Valvotomy, pulmonary valve, open heart; with inflow occlusion	VALVE	Procedure
33474	CPT	Valvotomy, pulmonary valve, open heart, with cardiopulmonary bypass	VALVE	Procedure
33475	CPT	Replacement, pulmonary valve	VALVE	Procedure
02104Z3	ICD10	BYPASS CORONARY ARTERY, ONE ARTERY FROM CORONARY ARTERY, PERCUTANEOUS ENDOSCOPIC APPROACH	CABG	Procedure
02104K3	ICD10	BYPASS CORONARY ARTERY, ONE ARTERY FROM CORONARY ARTERY WITH NONAUTOLOGOUS TISSUE SUBSTITUTE, PERCUTANEOUS ENDOSCOPIC APPROACH	CABG	Procedure
02104J3	ICD10	BYPASS CORONARY ARTERY, ONE ARTERY FROM CORONARY ARTERY WITH SYNTHETIC SUBSTITUTE, PERCUTANEOUS ENDOSCOPIC APPROACH	CABG	Procedure
02104A3	ICD10	BYPASS CORONARY ARTERY, ONE ARTERY FROM CORONARY ARTERY WITH AUTOLOGOUS ARTERIAL TISSUE, PERCUTANEOUS ENDOSCOPIC APPROACH	CABG	Procedure
0210493	ICD10	BYPASS CORONARY ARTERY, ONE ARTERY FROM CORONARY ARTERY WITH AUTOLOGOUS VENOUS TISSUE, PERCUTANEOUS ENDOSCOPIC APPROACH	CABG	Procedure
02100Z3	ICD10	BYPASS CORONARY ARTERY, ONE ARTERY FROM CORONARY ARTERY, OPEN APPROACH	CABG	Procedure
02100K3	ICD10	BYPASS CORONARY ARTERY, ONE ARTERY FROM CORONARY ARTERY WITH NONAUTOLOGOUS TISSUE SUBSTITUTE, OPEN APPROACH	CABG	Procedure
02100J3	ICD10	BYPASS CORONARY ARTERY, ONE ARTERY FROM CORONARY ARTERY WITH SYNTHETIC SUBSTITUTE, OPEN APPROACH	CABG	Procedure
02100A3	ICD10	BYPASS CORONARY ARTERY, ONE ARTERY FROM CORONARY ARTERY WITH AUTOLOGOUS ARTERIAL TISSUE, OPEN APPROACH	CABG	Procedure
0210093	ICD10	BYPASS CORONARY ARTERY, ONE ARTERY FROM CORONARY ARTERY WITH AUTOLOGOUS VENOUS TISSUE, OPEN APPROACH	CABG	Procedure
02104JW	ICD10	BYPASS CORONARY ARTERY, ONE ARTERY FROM AORTA WITH SYNTHETIC SUBSTITUTE, PERCUTANEOUS ENDOSCOPIC APPROACH	CABG	Procedure
02100AW	ICD10	BYPASS CORONARY ARTERY, ONE ARTERY FROM AORTA WITH AUTOLOGOUS ARTERIAL TISSUE, OPEN APPROACH	CABG	Procedure
021008W	ICD10	BYPASS CORONARY ARTERY, ONE ARTERY FROM AORTA WITH ZOOPLASTIC TISSUE, OPEN APPROACH	CABG	Procedure
02104KW	ICD10	BYPASS CORONARY ARTERY, ONE ARTERY FROM AORTA WITH NONAUTOLOGOUS TISSUE SUBSTITUTE, PERCUTANEOUS ENDOSCOPIC APPROACH	CABG	Procedure
02104AW	ICD10	BYPASS CORONARY ARTERY, ONE ARTERY FROM AORTA WITH AUTOLOGOUS ARTERIAL TISSUE, PERCUTANEOUS ENDOSCOPIC APPROACH	CABG	Procedure
021049W	ICD10	BYPASS CORONARY ARTERY, ONE ARTERY FROM AORTA WITH AUTOLOGOUS VENOUS TISSUE, PERCUTANEOUS ENDOSCOPIC APPROACH	CABG	Procedure
021009W	ICD10	BYPASS CORONARY ARTERY, ONE ARTERY FROM AORTA WITH AUTOLOGOUS VENOUS TISSUE, OPEN APPROACH	CABG	Procedure
02100JW	ICD10	BYPASS CORONARY ARTERY, ONE ARTERY FROM AORTA WITH SYNTHETIC SUBSTITUTE, OPEN APPROACH	CABG	Procedure
021048W	ICD10	BYPASS CORONARY ARTERY, ONE ARTERY FROM AORTA WITH ZOOPLASTIC TISSUE, PERCUTANEOUS ENDOSCOPIC APPROACH	CABG	Procedure
02100KW	ICD10	BYPASS CORONARY ARTERY, ONE ARTERY FROM AORTA WITH NONAUTOLOGOUS TISSUE SUBSTITUTE, OPEN APPROACH	CABG	Procedure
02114KW	ICD10	BYPASS CORONARY ARTERY, TWO ARTERIES FROM AORTA WITH NONAUTOLOGOUS TISSUE SUBSTITUTE, PERCUTANEOUS ENDOSCOPIC APPROACH	CABG	Procedure
02114JW	ICD10	BYPASS CORONARY ARTERY, TWO ARTERIES FROM AORTA WITH SYNTHETIC SUBSTITUTE, PERCUTANEOUS ENDOSCOPIC APPROACH	CABG	Procedure
02114AW	ICD10	BYPASS CORONARY ARTERY, TWO ARTERIES FROM AORTA WITH AUTOLOGOUS ARTERIAL TISSUE, PERCUTANEOUS ENDOSCOPIC APPROACH	CABG	Procedure
021149W	ICD10	BYPASS CORONARY ARTERY, TWO ARTERIES FROM AORTA WITH AUTOLOGOUS VENOUS TISSUE, PERCUTANEOUS ENDOSCOPIC APPROACH	CABG	Procedure
021148W	ICD10	BYPASS CORONARY ARTERY, TWO ARTERIES FROM AORTA WITH ZOOPLASTIC TISSUE, PERCUTANEOUS ENDOSCOPIC APPROACH	CABG	Procedure
02110KW	ICD10	BYPASS CORONARY ARTERY, TWO ARTERIES FROM AORTA WITH NONAUTOLOGOUS TISSUE SUBSTITUTE, OPEN APPROACH	CABG	Procedure
02110JW	ICD10	BYPASS CORONARY ARTERY, TWO ARTERIES FROM AORTA WITH SYNTHETIC SUBSTITUTE, OPEN APPROACH	CABG	Procedure
02110AW	ICD10	BYPASS CORONARY ARTERY, TWO ARTERIES FROM AORTA WITH AUTOLOGOUS ARTERIAL TISSUE, OPEN APPROACH	CABG	Procedure
021109W	ICD10	BYPASS CORONARY ARTERY, TWO ARTERIES FROM AORTA WITH AUTOLOGOUS VENOUS TISSUE, OPEN APPROACH	CABG	Procedure
021108W	ICD10	BYPASS CORONARY ARTERY, TWO ARTERIES FROM AORTA WITH ZOOPLASTIC TISSUE, OPEN APPROACH	CABG	Procedure
02124KW	ICD10	BYPASS CORONARY ARTERY, THREE ARTERIES FROM AORTA WITH NONAUTOLOGOUS TISSUE SUBSTITUTE, PERCUTANEOUS ENDOSCOPIC APPROACH	CABG	Procedure
02124JW	ICD10	BYPASS CORONARY ARTERY, THREE ARTERIES FROM AORTA WITH SYNTHETIC SUBSTITUTE, PERCUTANEOUS ENDOSCOPIC APPROACH	CABG	Procedure
02124AW	ICD10	BYPASS CORONARY ARTERY, THREE ARTERIES FROM AORTA WITH AUTOLOGOUS ARTERIAL TISSUE, PERCUTANEOUS ENDOSCOPIC APPROACH	CABG	Procedure
021249W	ICD10	BYPASS CORONARY ARTERY, THREE ARTERIES FROM AORTA WITH AUTOLOGOUS VENOUS TISSUE, PERCUTANEOUS ENDOSCOPIC APPROACH	CABG	Procedure
021248W	ICD10	BYPASS CORONARY ARTERY, THREE ARTERIES FROM AORTA WITH ZOOPLASTIC TISSUE, PERCUTANEOUS ENDOSCOPIC APPROACH	CABG	Procedure
02120KW	ICD10	BYPASS CORONARY ARTERY, THREE ARTERIES FROM AORTA WITH NONAUTOLOGOUS TISSUE SUBSTITUTE, OPEN APPROACH	CABG	Procedure
02120JW	ICD10	BYPASS CORONARY ARTERY, THREE ARTERIES FROM AORTA WITH SYNTHETIC SUBSTITUTE, OPEN APPROACH	CABG	Procedure
02120AW	ICD10	BYPASS CORONARY ARTERY, THREE ARTERIES FROM AORTA WITH AUTOLOGOUS ARTERIAL TISSUE, OPEN APPROACH	CABG	Procedure
021209W	ICD10	BYPASS CORONARY ARTERY, THREE ARTERIES FROM AORTA WITH AUTOLOGOUS VENOUS TISSUE, OPEN APPROACH	CABG	Procedure
021208W	ICD10	BYPASS CORONARY ARTERY, THREE ARTERIES FROM AORTA WITH ZOOPLASTIC TISSUE, OPEN APPROACH	CABG	Procedure
02134KW	ICD10	BYPASS CORONARY ARTERY, FOUR OR MORE ARTERIES FROM AORTA WITH NONAUTOLOGOUS TISSUE SUBSTITUTE, PERCUTANEOUS ENDOSCOPIC APPROACH	CABG	Procedure
02134JW	ICD10	BYPASS CORONARY ARTERY, FOUR OR MORE ARTERIES FROM AORTA WITH SYNTHETIC SUBSTITUTE, PERCUTANEOUS ENDOSCOPIC APPROACH	CABG	Procedure
02134AW	ICD10	BYPASS CORONARY ARTERY, FOUR OR MORE ARTERIES FROM AORTA WITH AUTOLOGOUS ARTERIAL TISSUE, PERCUTANEOUS ENDOSCOPIC APPROACH	CABG	Procedure
021349W	ICD10	BYPASS CORONARY ARTERY, FOUR OR MORE ARTERIES FROM AORTA WITH AUTOLOGOUS VENOUS TISSUE, PERCUTANEOUS ENDOSCOPIC APPROACH	CABG	Procedure
021348W	ICD10	BYPASS CORONARY ARTERY, FOUR OR MORE ARTERIES FROM AORTA WITH ZOOPLASTIC TISSUE, PERCUTANEOUS ENDOSCOPIC APPROACH	CABG	Procedure
02130KW	ICD10	BYPASS CORONARY ARTERY, FOUR OR MORE ARTERIES FROM AORTA WITH NONAUTOLOGOUS TISSUE SUBSTITUTE, OPEN APPROACH	CABG	Procedure
02130JW	ICD10	BYPASS CORONARY ARTERY, FOUR OR MORE ARTERIES FROM AORTA WITH SYNTHETIC SUBSTITUTE, OPEN APPROACH	CABG	Procedure
02130AW	ICD10	BYPASS CORONARY ARTERY, FOUR OR MORE ARTERIES FROM AORTA WITH AUTOLOGOUS ARTERIAL TISSUE, OPEN APPROACH	CABG	Procedure
021309W	ICD10	BYPASS CORONARY ARTERY, FOUR OR MORE ARTERIES FROM AORTA WITH AUTOLOGOUS VENOUS TISSUE, OPEN APPROACH	CABG	Procedure
021308W	ICD10	BYPASS CORONARY ARTERY, FOUR OR MORE ARTERIES FROM AORTA WITH ZOOPLASTIC TISSUE, OPEN APPROACH	CABG	Procedure
02100K9	ICD10	BYPASS CORONARY ARTERY, ONE ARTERY FROM LEFT INTERNAL MAMMARY WITH NONAUTOLOGOUS TISSUE SUBSTITUTE, OPEN APPROACH	CABG	Procedure
02104Z9	ICD10	BYPASS CORONARY ARTERY, ONE ARTERY FROM LEFT INTERNAL MAMMARY, PERCUTANEOUS ENDOSCOPIC APPROACH	CABG	Procedure
02104Z8	ICD10	BYPASS CORONARY ARTERY, ONE ARTERY FROM RIGHT INTERNAL MAMMARY, PERCUTANEOUS ENDOSCOPIC APPROACH	CABG	Procedure
02104K9	ICD10	BYPASS CORONARY ARTERY, ONE ARTERY FROM LEFT INTERNAL MAMMARY WITH NONAUTOLOGOUS TISSUE SUBSTITUTE, PERCUTANEOUS ENDOSCOPIC APPROACH	CABG	Procedure
02104AC	ICD10	BYPASS CORONARY ARTERY, ONE ARTERY FROM THORACIC ARTERY WITH AUTOLOGOUS ARTERIAL TISSUE, PERCUTANEOUS ENDOSCOPIC APPROACH	CABG	Procedure
02104A9	ICD10	BYPASS CORONARY ARTERY, ONE ARTERY FROM LEFT INTERNAL MAMMARY WITH AUTOLOGOUS ARTERIAL TISSUE, PERCUTANEOUS ENDOSCOPIC APPROACH	CABG	Procedure
02100JC	ICD10	BYPASS CORONARY ARTERY, ONE ARTERY FROM THORACIC ARTERY WITH SYNTHETIC SUBSTITUTE, OPEN APPROACH	CABG	Procedure
02100A8	ICD10	BYPASS CORONARY ARTERY, ONE ARTERY FROM RIGHT INTERNAL MAMMARY WITH AUTOLOGOUS ARTERIAL TISSUE, OPEN APPROACH	CABG	Procedure
02100KC	ICD10	BYPASS CORONARY ARTERY, ONE ARTERY FROM THORACIC ARTERY WITH NONAUTOLOGOUS TISSUE SUBSTITUTE, OPEN APPROACH	CABG	Procedure
0210488	ICD10	BYPASS CORONARY ARTERY, ONE ARTERY FROM RIGHT INTERNAL MAMMARY WITH ZOOPLASTIC TISSUE, PERCUTANEOUS ENDOSCOPIC APPROACH	CABG	Procedure
02104K8	ICD10	BYPASS CORONARY ARTERY, ONE ARTERY FROM RIGHT INTERNAL MAMMARY WITH NONAUTOLOGOUS TISSUE SUBSTITUTE, PERCUTANEOUS ENDOSCOPIC APPROACH	CABG	Procedure
02104KC	ICD10	BYPASS CORONARY ARTERY, ONE ARTERY FROM THORACIC ARTERY WITH NONAUTOLOGOUS TISSUE SUBSTITUTE, PERCUTANEOUS ENDOSCOPIC APPROACH	CABG	Procedure
02104ZC	ICD10	BYPASS CORONARY ARTERY, ONE ARTERY FROM THORACIC ARTERY, PERCUTANEOUS ENDOSCOPIC APPROACH	CABG	Procedure
02100Z9	ICD10	BYPASS CORONARY ARTERY, ONE ARTERY FROM LEFT INTERNAL MAMMARY, OPEN APPROACH	CABG	Procedure
02100ZC	ICD10	BYPASS CORONARY ARTERY, ONE ARTERY FROM THORACIC ARTERY, OPEN APPROACH	CABG	Procedure
02104A8	ICD10	BYPASS CORONARY ARTERY, ONE ARTERY FROM RIGHT INTERNAL MAMMARY WITH AUTOLOGOUS ARTERIAL TISSUE, PERCUTANEOUS ENDOSCOPIC APPROACH	CABG	Procedure
02104JC	ICD10	BYPASS CORONARY ARTERY, ONE ARTERY FROM THORACIC ARTERY WITH SYNTHETIC SUBSTITUTE, PERCUTANEOUS ENDOSCOPIC APPROACH	CABG	Procedure
0210099	ICD10	BYPASS CORONARY ARTERY, ONE ARTERY FROM LEFT INTERNAL MAMMARY WITH AUTOLOGOUS VENOUS TISSUE, OPEN APPROACH	CABG	Procedure
021009C	ICD10	BYPASS CORONARY ARTERY, ONE ARTERY FROM THORACIC ARTERY WITH AUTOLOGOUS VENOUS TISSUE, OPEN APPROACH	CABG	Procedure
02100A9	ICD10	BYPASS CORONARY ARTERY, ONE ARTERY FROM LEFT INTERNAL MAMMARY WITH AUTOLOGOUS ARTERIAL TISSUE, OPEN APPROACH	CABG	Procedure
02100AC	ICD10	BYPASS CORONARY ARTERY, ONE ARTERY FROM THORACIC ARTERY WITH AUTOLOGOUS ARTERIAL TISSUE, OPEN APPROACH	CABG	Procedure
02100J8	ICD10	BYPASS CORONARY ARTERY, ONE ARTERY FROM RIGHT INTERNAL MAMMARY WITH SYNTHETIC SUBSTITUTE, OPEN APPROACH	CABG	Procedure
02100J9	ICD10	BYPASS CORONARY ARTERY, ONE ARTERY FROM LEFT INTERNAL MAMMARY WITH SYNTHETIC SUBSTITUTE, OPEN APPROACH	CABG	Procedure
0210098	ICD10	BYPASS CORONARY ARTERY, ONE ARTERY FROM RIGHT INTERNAL MAMMARY WITH AUTOLOGOUS VENOUS TISSUE, OPEN APPROACH	CABG	Procedure
02100K8	ICD10	BYPASS CORONARY ARTERY, ONE ARTERY FROM RIGHT INTERNAL MAMMARY WITH NONAUTOLOGOUS TISSUE SUBSTITUTE, OPEN APPROACH	CABG	Procedure
02104J9	ICD10	BYPASS CORONARY ARTERY, ONE ARTERY FROM LEFT INTERNAL MAMMARY WITH SYNTHETIC SUBSTITUTE, PERCUTANEOUS ENDOSCOPIC APPROACH	CABG	Procedure
02104J8	ICD10	BYPASS CORONARY ARTERY, ONE ARTERY FROM RIGHT INTERNAL MAMMARY WITH SYNTHETIC SUBSTITUTE, PERCUTANEOUS ENDOSCOPIC APPROACH	CABG	Procedure
0210088	ICD10	BYPASS CORONARY ARTERY, ONE ARTERY FROM RIGHT INTERNAL MAMMARY WITH ZOOPLASTIC TISSUE, OPEN APPROACH	CABG	Procedure
0210089	ICD10	BYPASS CORONARY ARTERY, ONE ARTERY FROM LEFT INTERNAL MAMMARY WITH ZOOPLASTIC TISSUE, OPEN APPROACH	CABG	Procedure
0210489	ICD10	BYPASS CORONARY ARTERY, ONE ARTERY FROM LEFT INTERNAL MAMMARY WITH ZOOPLASTIC TISSUE, PERCUTANEOUS ENDOSCOPIC APPROACH	CABG	Procedure
021048C	ICD10	BYPASS CORONARY ARTERY, ONE ARTERY FROM THORACIC ARTERY WITH ZOOPLASTIC TISSUE, PERCUTANEOUS ENDOSCOPIC APPROACH	CABG	Procedure
021008C	ICD10	BYPASS CORONARY ARTERY, ONE ARTERY FROM THORACIC ARTERY WITH ZOOPLASTIC TISSUE, OPEN APPROACH	CABG	Procedure
0210498	ICD10	BYPASS CORONARY ARTERY, ONE ARTERY FROM RIGHT INTERNAL MAMMARY WITH AUTOLOGOUS VENOUS TISSUE, PERCUTANEOUS ENDOSCOPIC APPROACH	CABG	Procedure
0210499	ICD10	BYPASS CORONARY ARTERY, ONE ARTERY FROM LEFT INTERNAL MAMMARY WITH AUTOLOGOUS VENOUS TISSUE, PERCUTANEOUS ENDOSCOPIC APPROACH	CABG	Procedure
021049C	ICD10	BYPASS CORONARY ARTERY, ONE ARTERY FROM THORACIC ARTERY WITH AUTOLOGOUS VENOUS TISSUE, PERCUTANEOUS ENDOSCOPIC APPROACH	CABG	Procedure
02100Z8	ICD10	BYPASS CORONARY ARTERY, ONE ARTERY FROM RIGHT INTERNAL MAMMARY, OPEN APPROACH	CABG	Procedure
02134ZC	ICD10	BYPASS CORONARY ARTERY, FOUR OR MORE ARTERIES FROM THORACIC ARTERY, PERCUTANEOUS ENDOSCOPIC APPROACH	CABG	Procedure
02134KC	ICD10	BYPASS CORONARY ARTERY, FOUR OR MORE ARTERIES FROM THORACIC ARTERY WITH NONAUTOLOGOUS TISSUE SUBSTITUTE, PERCUTANEOUS ENDOSCOPIC APPROACH	CABG	Procedure
02134JC	ICD10	BYPASS CORONARY ARTERY, FOUR OR MORE ARTERIES FROM THORACIC ARTERY WITH SYNTHETIC SUBSTITUTE, PERCUTANEOUS ENDOSCOPIC APPROACH	CABG	Procedure
02134AC	ICD10	BYPASS CORONARY ARTERY, FOUR OR MORE ARTERIES FROM THORACIC ARTERY WITH AUTOLOGOUS ARTERIAL TISSUE, PERCUTANEOUS ENDOSCOPIC APPROACH	CABG	Procedure
021349C	ICD10	BYPASS CORONARY ARTERY, FOUR OR MORE ARTERIES FROM THORACIC ARTERY WITH AUTOLOGOUS VENOUS TISSUE, PERCUTANEOUS ENDOSCOPIC APPROACH	CABG	Procedure
02130ZC	ICD10	BYPASS CORONARY ARTERY, FOUR OR MORE ARTERIES FROM THORACIC ARTERY, OPEN APPROACH	CABG	Procedure
02130JC	ICD10	BYPASS CORONARY ARTERY, FOUR OR MORE ARTERIES FROM THORACIC ARTERY WITH SYNTHETIC SUBSTITUTE, OPEN APPROACH	CABG	Procedure
02130AC	ICD10	BYPASS CORONARY ARTERY, FOUR OR MORE ARTERIES FROM THORACIC ARTERY WITH AUTOLOGOUS ARTERIAL TISSUE, OPEN APPROACH	CABG	Procedure
021309C	ICD10	BYPASS CORONARY ARTERY, FOUR OR MORE ARTERIES FROM THORACIC ARTERY WITH AUTOLOGOUS VENOUS TISSUE, OPEN APPROACH	CABG	Procedure
02124ZC	ICD10	BYPASS CORONARY ARTERY, THREE ARTERIES FROM THORACIC ARTERY, PERCUTANEOUS ENDOSCOPIC APPROACH	CABG	Procedure
02124KC	ICD10	BYPASS CORONARY ARTERY, THREE ARTERIES FROM THORACIC ARTERY WITH NONAUTOLOGOUS TISSUE SUBSTITUTE, PERCUTANEOUS ENDOSCOPIC APPROACH	CABG	Procedure
02124JC	ICD10	BYPASS CORONARY ARTERY, THREE ARTERIES FROM THORACIC ARTERY WITH SYNTHETIC SUBSTITUTE, PERCUTANEOUS ENDOSCOPIC APPROACH	CABG	Procedure
02124AC	ICD10	BYPASS CORONARY ARTERY, THREE ARTERIES FROM THORACIC ARTERY WITH AUTOLOGOUS ARTERIAL TISSUE, PERCUTANEOUS ENDOSCOPIC APPROACH	CABG	Procedure
021249C	ICD10	BYPASS CORONARY ARTERY, THREE ARTERIES FROM THORACIC ARTERY WITH AUTOLOGOUS VENOUS TISSUE, PERCUTANEOUS ENDOSCOPIC APPROACH	CABG	Procedure
021248C	ICD10	BYPASS CORONARY ARTERY, THREE ARTERIES FROM THORACIC ARTERY WITH ZOOPLASTIC TISSUE, PERCUTANEOUS ENDOSCOPIC APPROACH	CABG	Procedure
02120ZC	ICD10	BYPASS CORONARY ARTERY, THREE ARTERIES FROM THORACIC ARTERY, OPEN APPROACH	CABG	Procedure
02120KC	ICD10	BYPASS CORONARY ARTERY, THREE ARTERIES FROM THORACIC ARTERY WITH NONAUTOLOGOUS TISSUE SUBSTITUTE, OPEN APPROACH	CABG	Procedure
02120JC	ICD10	BYPASS CORONARY ARTERY, THREE ARTERIES FROM THORACIC ARTERY WITH SYNTHETIC SUBSTITUTE, OPEN APPROACH	CABG	Procedure
02120AC	ICD10	BYPASS CORONARY ARTERY, THREE ARTERIES FROM THORACIC ARTERY WITH AUTOLOGOUS ARTERIAL TISSUE, OPEN APPROACH	CABG	Procedure
021209C	ICD10	BYPASS CORONARY ARTERY, THREE ARTERIES FROM THORACIC ARTERY WITH AUTOLOGOUS VENOUS TISSUE, OPEN APPROACH	CABG	Procedure
021208C	ICD10	BYPASS CORONARY ARTERY, THREE ARTERIES FROM THORACIC ARTERY WITH ZOOPLASTIC TISSUE, OPEN APPROACH	CABG	Procedure
02114ZC	ICD10	BYPASS CORONARY ARTERY, TWO ARTERIES FROM THORACIC ARTERY, PERCUTANEOUS ENDOSCOPIC APPROACH	CABG	Procedure
02114Z9	ICD10	BYPASS CORONARY ARTERY, TWO ARTERIES FROM LEFT INTERNAL MAMMARY, PERCUTANEOUS ENDOSCOPIC APPROACH	CABG	Procedure
02114Z8	ICD10	BYPASS CORONARY ARTERY, TWO ARTERIES FROM RIGHT INTERNAL MAMMARY, PERCUTANEOUS ENDOSCOPIC APPROACH	CABG	Procedure
02114KC	ICD10	BYPASS CORONARY ARTERY, TWO ARTERIES FROM THORACIC ARTERY WITH NONAUTOLOGOUS TISSUE SUBSTITUTE, PERCUTANEOUS ENDOSCOPIC APPROACH	CABG	Procedure
02114K9	ICD10	BYPASS CORONARY ARTERY, TWO ARTERIES FROM LEFT INTERNAL MAMMARY WITH NONAUTOLOGOUS TISSUE SUBSTITUTE, PERCUTANEOUS ENDOSCOPIC APPROACH	CABG	Procedure
02114K8	ICD10	BYPASS CORONARY ARTERY, TWO ARTERIES FROM RIGHT INTERNAL MAMMARY WITH NONAUTOLOGOUS TISSUE SUBSTITUTE, PERCUTANEOUS ENDOSCOPIC APPROACH	CABG	Procedure
02114JC	ICD10	BYPASS CORONARY ARTERY, TWO ARTERIES FROM THORACIC ARTERY WITH SYNTHETIC SUBSTITUTE, PERCUTANEOUS ENDOSCOPIC APPROACH	CABG	Procedure
02114J9	ICD10	BYPASS CORONARY ARTERY, TWO ARTERIES FROM LEFT INTERNAL MAMMARY WITH SYNTHETIC SUBSTITUTE, PERCUTANEOUS ENDOSCOPIC APPROACH	CABG	Procedure
02114J8	ICD10	BYPASS CORONARY ARTERY, TWO ARTERIES FROM RIGHT INTERNAL MAMMARY WITH SYNTHETIC SUBSTITUTE, PERCUTANEOUS ENDOSCOPIC APPROACH	CABG	Procedure
02114AC	ICD10	BYPASS CORONARY ARTERY, TWO ARTERIES FROM THORACIC ARTERY WITH AUTOLOGOUS ARTERIAL TISSUE, PERCUTANEOUS ENDOSCOPIC APPROACH	CABG	Procedure
02114A9	ICD10	BYPASS CORONARY ARTERY, TWO ARTERIES FROM LEFT INTERNAL MAMMARY WITH AUTOLOGOUS ARTERIAL TISSUE, PERCUTANEOUS ENDOSCOPIC APPROACH	CABG	Procedure
02114A8	ICD10	BYPASS CORONARY ARTERY, TWO ARTERIES FROM RIGHT INTERNAL MAMMARY WITH AUTOLOGOUS ARTERIAL TISSUE, PERCUTANEOUS ENDOSCOPIC APPROACH	CABG	Procedure
021149C	ICD10	BYPASS CORONARY ARTERY, TWO ARTERIES FROM THORACIC ARTERY WITH AUTOLOGOUS VENOUS TISSUE, PERCUTANEOUS ENDOSCOPIC APPROACH	CABG	Procedure
0211499	ICD10	BYPASS CORONARY ARTERY, TWO ARTERIES FROM LEFT INTERNAL MAMMARY WITH AUTOLOGOUS VENOUS TISSUE, PERCUTANEOUS ENDOSCOPIC APPROACH	CABG	Procedure
0211498	ICD10	BYPASS CORONARY ARTERY, TWO ARTERIES FROM RIGHT INTERNAL MAMMARY WITH AUTOLOGOUS VENOUS TISSUE, PERCUTANEOUS ENDOSCOPIC APPROACH	CABG	Procedure
021148C	ICD10	BYPASS CORONARY ARTERY, TWO ARTERIES FROM THORACIC ARTERY WITH ZOOPLASTIC TISSUE, PERCUTANEOUS ENDOSCOPIC APPROACH	CABG	Procedure
0211489	ICD10	BYPASS CORONARY ARTERY, TWO ARTERIES FROM LEFT INTERNAL MAMMARY WITH ZOOPLASTIC TISSUE, PERCUTANEOUS ENDOSCOPIC APPROACH	CABG	Procedure
0211488	ICD10	BYPASS CORONARY ARTERY, TWO ARTERIES FROM RIGHT INTERNAL MAMMARY WITH ZOOPLASTIC TISSUE, PERCUTANEOUS ENDOSCOPIC APPROACH	CABG	Procedure
02110ZC	ICD10	BYPASS CORONARY ARTERY, TWO ARTERIES FROM THORACIC ARTERY, OPEN APPROACH	CABG	Procedure
02110Z9	ICD10	BYPASS CORONARY ARTERY, TWO ARTERIES FROM LEFT INTERNAL MAMMARY, OPEN APPROACH	CABG	Procedure
02110Z8	ICD10	BYPASS CORONARY ARTERY, TWO ARTERIES FROM RIGHT INTERNAL MAMMARY, OPEN APPROACH	CABG	Procedure
02110KC	ICD10	BYPASS CORONARY ARTERY, TWO ARTERIES FROM THORACIC ARTERY WITH NONAUTOLOGOUS TISSUE SUBSTITUTE, OPEN APPROACH	CABG	Procedure
02110K9	ICD10	BYPASS CORONARY ARTERY, TWO ARTERIES FROM LEFT INTERNAL MAMMARY WITH NONAUTOLOGOUS TISSUE SUBSTITUTE, OPEN APPROACH	CABG	Procedure
02110K8	ICD10	BYPASS CORONARY ARTERY, TWO ARTERIES FROM RIGHT INTERNAL MAMMARY WITH NONAUTOLOGOUS TISSUE SUBSTITUTE, OPEN APPROACH	CABG	Procedure
02110JC	ICD10	BYPASS CORONARY ARTERY, TWO ARTERIES FROM THORACIC ARTERY WITH SYNTHETIC SUBSTITUTE, OPEN APPROACH	CABG	Procedure
02110J9	ICD10	BYPASS CORONARY ARTERY, TWO ARTERIES FROM LEFT INTERNAL MAMMARY WITH SYNTHETIC SUBSTITUTE, OPEN APPROACH	CABG	Procedure
02110J8	ICD10	BYPASS CORONARY ARTERY, TWO ARTERIES FROM RIGHT INTERNAL MAMMARY WITH SYNTHETIC SUBSTITUTE, OPEN APPROACH	CABG	Procedure
02110AC	ICD10	BYPASS CORONARY ARTERY, TWO ARTERIES FROM THORACIC ARTERY WITH AUTOLOGOUS ARTERIAL TISSUE, OPEN APPROACH	CABG	Procedure
02110A9	ICD10	BYPASS CORONARY ARTERY, TWO ARTERIES FROM LEFT INTERNAL MAMMARY WITH AUTOLOGOUS ARTERIAL TISSUE, OPEN APPROACH	CABG	Procedure
02110A8	ICD10	BYPASS CORONARY ARTERY, TWO ARTERIES FROM RIGHT INTERNAL MAMMARY WITH AUTOLOGOUS ARTERIAL TISSUE, OPEN APPROACH	CABG	Procedure
021109C	ICD10	BYPASS CORONARY ARTERY, TWO ARTERIES FROM THORACIC ARTERY WITH AUTOLOGOUS VENOUS TISSUE, OPEN APPROACH	CABG	Procedure
0211099	ICD10	BYPASS CORONARY ARTERY, TWO ARTERIES FROM LEFT INTERNAL MAMMARY WITH AUTOLOGOUS VENOUS TISSUE, OPEN APPROACH	CABG	Procedure
0211098	ICD10	BYPASS CORONARY ARTERY, TWO ARTERIES FROM RIGHT INTERNAL MAMMARY WITH AUTOLOGOUS VENOUS TISSUE, OPEN APPROACH	CABG	Procedure
021108C	ICD10	BYPASS CORONARY ARTERY, TWO ARTERIES FROM THORACIC ARTERY WITH ZOOPLASTIC TISSUE, OPEN APPROACH	CABG	Procedure
0211089	ICD10	BYPASS CORONARY ARTERY, TWO ARTERIES FROM LEFT INTERNAL MAMMARY WITH ZOOPLASTIC TISSUE, OPEN APPROACH	CABG	Procedure
0211088	ICD10	BYPASS CORONARY ARTERY, TWO ARTERIES FROM RIGHT INTERNAL MAMMARY WITH ZOOPLASTIC TISSUE, OPEN APPROACH	CABG	Procedure
021348C	ICD10	BYPASS CORONARY ARTERY, FOUR OR MORE ARTERIES FROM THORACIC ARTERY WITH ZOOPLASTIC TISSUE, PERCUTANEOUS ENDOSCOPIC APPROACH	CABG	Procedure
021308C	ICD10	BYPASS CORONARY ARTERY, FOUR OR MORE ARTERIES FROM THORACIC ARTERY WITH ZOOPLASTIC TISSUE, OPEN APPROACH	CABG	Procedure
02130KC	ICD10	BYPASS CORONARY ARTERY, FOUR OR MORE ARTERIES FROM THORACIC ARTERY WITH NONAUTOLOGOUS TISSUE SUBSTITUTE, OPEN APPROACH	CABG	Procedure
02104ZF	ICD10	BYPASS CORONARY ARTERY, ONE ARTERY FROM ABDOMINAL ARTERY, PERCUTANEOUS ENDOSCOPIC APPROACH	CABG	Procedure
02104KF	ICD10	BYPASS CORONARY ARTERY, ONE ARTERY FROM ABDOMINAL ARTERY WITH NONAUTOLOGOUS TISSUE SUBSTITUTE, PERCUTANEOUS ENDOSCOPIC APPROACH	CABG	Procedure
02104JF	ICD10	BYPASS CORONARY ARTERY, ONE ARTERY FROM ABDOMINAL ARTERY WITH SYNTHETIC SUBSTITUTE, PERCUTANEOUS ENDOSCOPIC APPROACH	CABG	Procedure
02104AF	ICD10	BYPASS CORONARY ARTERY, ONE ARTERY FROM ABDOMINAL ARTERY WITH AUTOLOGOUS ARTERIAL TISSUE, PERCUTANEOUS ENDOSCOPIC APPROACH	CABG	Procedure
021049F	ICD10	BYPASS CORONARY ARTERY, ONE ARTERY FROM ABDOMINAL ARTERY WITH AUTOLOGOUS VENOUS TISSUE, PERCUTANEOUS ENDOSCOPIC APPROACH	CABG	Procedure
021048F	ICD10	BYPASS CORONARY ARTERY, ONE ARTERY FROM ABDOMINAL ARTERY WITH ZOOPLASTIC TISSUE, PERCUTANEOUS ENDOSCOPIC APPROACH	CABG	Procedure
02100ZF	ICD10	BYPASS CORONARY ARTERY, ONE ARTERY FROM ABDOMINAL ARTERY, OPEN APPROACH	CABG	Procedure
02100KF	ICD10	BYPASS CORONARY ARTERY, ONE ARTERY FROM ABDOMINAL ARTERY WITH NONAUTOLOGOUS TISSUE SUBSTITUTE, OPEN APPROACH	CABG	Procedure
02100JF	ICD10	BYPASS CORONARY ARTERY, ONE ARTERY FROM ABDOMINAL ARTERY WITH SYNTHETIC SUBSTITUTE, OPEN APPROACH	CABG	Procedure
02100AF	ICD10	BYPASS CORONARY ARTERY, ONE ARTERY FROM ABDOMINAL ARTERY WITH AUTOLOGOUS ARTERIAL TISSUE, OPEN APPROACH	CABG	Procedure
021009F	ICD10	BYPASS CORONARY ARTERY, ONE ARTERY FROM ABDOMINAL ARTERY WITH AUTOLOGOUS VENOUS TISSUE, OPEN APPROACH	CABG	Procedure
021008F	ICD10	BYPASS CORONARY ARTERY, ONE ARTERY FROM ABDOMINAL ARTERY WITH ZOOPLASTIC TISSUE, OPEN APPROACH	CABG	Procedure
0210083	ICD10	BYPASS CORONARY ARTERY, ONE ARTERY FROM CORONARY ARTERY WITH ZOOPLASTIC TISSUE, OPEN APPROACH	CABG	Procedure
0210483	ICD10	BYPASS CORONARY ARTERY, ONE ARTERY FROM CORONARY ARTERY WITH ZOOPLASTIC TISSUE, PERCUTANEOUS ENDOSCOPIC APPROACH	CABG	Procedure
X2RF332	ICD10	REPLACEMENT OF AORTIC VALVE USING ZOOPLASTIC TISSUE, RAPID DEPLOYMENT TECHNIQUE, PERCUTANEOUS APPROACH, NEW TECHNOLOGY GROUP 2	VALVE	Procedure
02RF3KZ	ICD10	REPLACEMENT OF AORTIC VALVE WITH NONAUTOLOGOUS TISSUE SUBSTITUTE, PERCUTANEOUS APPROACH	VALVE	Procedure
02RF3JZ	ICD10	REPLACEMENT OF AORTIC VALVE WITH SYNTHETIC SUBSTITUTE, PERCUTANEOUS APPROACH	VALVE	Procedure
02RF38Z	ICD10	REPLACEMENT OF AORTIC VALVE WITH ZOOPLASTIC TISSUE, PERCUTANEOUS APPROACH	VALVE	Procedure
02RF37Z	ICD10	REPLACEMENT OF AORTIC VALVE WITH AUTOLOGOUS TISSUE SUBSTITUTE, PERCUTANEOUS APPROACH	VALVE	Procedure
02RF3KH	ICD10	REPLACEMENT OF AORTIC VALVE WITH NONAUTOLOGOUS TISSUE SUBSTITUTE, TRANSAPICAL, PERCUTANEOUS APPROACH	VALVE	Procedure
02RF3JH	ICD10	REPLACEMENT OF AORTIC VALVE WITH SYNTHETIC SUBSTITUTE, TRANSAPICAL, PERCUTANEOUS APPROACH	VALVE	Procedure
02RF38H	ICD10	REPLACEMENT OF AORTIC VALVE WITH ZOOPLASTIC TISSUE, TRANSAPICAL, PERCUTANEOUS APPROACH	VALVE	Procedure
02RF37H	ICD10	REPLACEMENT OF AORTIC VALVE WITH AUTOLOGOUS TISSUE SUBSTITUTE, TRANSAPICAL, PERCUTANEOUS APPROACH	VALVE	Procedure
02RH3KZ	ICD10	REPLACEMENT OF PULMONARY VALVE WITH NONAUTOLOGOUS TISSUE SUBSTITUTE, PERCUTANEOUS APPROACH	VALVE	Procedure
02RH3JZ	ICD10	REPLACEMENT OF PULMONARY VALVE WITH SYNTHETIC SUBSTITUTE, PERCUTANEOUS APPROACH	VALVE	Procedure
02RH38Z	ICD10	REPLACEMENT OF PULMONARY VALVE WITH ZOOPLASTIC TISSUE, PERCUTANEOUS APPROACH	VALVE	Procedure
02RH37Z	ICD10	REPLACEMENT OF PULMONARY VALVE WITH AUTOLOGOUS TISSUE SUBSTITUTE, PERCUTANEOUS APPROACH	VALVE	Procedure
02RH3KH	ICD10	REPLACEMENT OF PULMONARY VALVE WITH NONAUTOLOGOUS TISSUE SUBSTITUTE, TRANSAPICAL, PERCUTANEOUS APPROACH	VALVE	Procedure
02RH3JH	ICD10	REPLACEMENT OF PULMONARY VALVE WITH SYNTHETIC SUBSTITUTE, TRANSAPICAL, PERCUTANEOUS APPROACH	VALVE	Procedure
02RH38H	ICD10	REPLACEMENT OF PULMONARY VALVE WITH ZOOPLASTIC TISSUE, TRANSAPICAL, PERCUTANEOUS APPROACH	VALVE	Procedure
02RH37H	ICD10	REPLACEMENT OF PULMONARY VALVE WITH AUTOLOGOUS TISSUE SUBSTITUTE, TRANSAPICAL, PERCUTANEOUS APPROACH	VALVE	Procedure
02RG3KZ	ICD10	REPLACEMENT OF MITRAL VALVE WITH NONAUTOLOGOUS TISSUE SUBSTITUTE, PERCUTANEOUS APPROACH	VALVE	Procedure
02RG3KH	ICD10	REPLACEMENT OF MITRAL VALVE WITH NONAUTOLOGOUS TISSUE SUBSTITUTE, TRANSAPICAL, PERCUTANEOUS APPROACH	VALVE	Procedure
02RG3JZ	ICD10	REPLACEMENT OF MITRAL VALVE WITH SYNTHETIC SUBSTITUTE, PERCUTANEOUS APPROACH	VALVE	Procedure
02RG3JH	ICD10	REPLACEMENT OF MITRAL VALVE WITH SYNTHETIC SUBSTITUTE, TRANSAPICAL, PERCUTANEOUS APPROACH	VALVE	Procedure
02RG38Z	ICD10	REPLACEMENT OF MITRAL VALVE WITH ZOOPLASTIC TISSUE, PERCUTANEOUS APPROACH	VALVE	Procedure
02RG38H	ICD10	REPLACEMENT OF MITRAL VALVE WITH ZOOPLASTIC TISSUE, TRANSAPICAL, PERCUTANEOUS APPROACH	VALVE	Procedure
02RG37Z	ICD10	REPLACEMENT OF MITRAL VALVE WITH AUTOLOGOUS TISSUE SUBSTITUTE, PERCUTANEOUS APPROACH	VALVE	Procedure
02RG37H	ICD10	REPLACEMENT OF MITRAL VALVE WITH AUTOLOGOUS TISSUE SUBSTITUTE, TRANSAPICAL, PERCUTANEOUS APPROACH	VALVE	Procedure
02QJ0ZZ	ICD10	REPAIR TRICUSPID VALVE, OPEN APPROACH	VALVE	Procedure
02QH0ZZ	ICD10	REPAIR PULMONARY VALVE, OPEN APPROACH	VALVE	Procedure
02QG0ZZ	ICD10	REPAIR MITRAL VALVE, OPEN APPROACH	VALVE	Procedure
02QF0ZZ	ICD10	REPAIR AORTIC VALVE, OPEN APPROACH	VALVE	Procedure
02NF0ZZ	ICD10	RELEASE AORTIC VALVE, OPEN APPROACH	VALVE	Procedure
027F0ZZ	ICD10	DILATION OF AORTIC VALVE, OPEN APPROACH	VALVE	Procedure
027F0DZ	ICD10	DILATION OF AORTIC VALVE WITH INTRALUMINAL DEVICE, OPEN APPROACH	VALVE	Procedure
027F04Z	ICD10	DILATION OF AORTIC VALVE WITH DRUG-ELUTING INTRALUMINAL DEVICE, OPEN APPROACH	VALVE	Procedure
02NG0ZZ	ICD10	RELEASE MITRAL VALVE, OPEN APPROACH	VALVE	Procedure
027G0ZZ	ICD10	DILATION OF MITRAL VALVE, OPEN APPROACH	VALVE	Procedure
027G0DZ	ICD10	DILATION OF MITRAL VALVE WITH INTRALUMINAL DEVICE, OPEN APPROACH	VALVE	Procedure
027G04Z	ICD10	DILATION OF MITRAL VALVE WITH DRUG-ELUTING INTRALUMINAL DEVICE, OPEN APPROACH	VALVE	Procedure
02NH0ZZ	ICD10	RELEASE PULMONARY VALVE, OPEN APPROACH	VALVE	Procedure
027H0ZZ	ICD10	DILATION OF PULMONARY VALVE, OPEN APPROACH	VALVE	Procedure
027H0DZ	ICD10	DILATION OF PULMONARY VALVE WITH INTRALUMINAL DEVICE, OPEN APPROACH	VALVE	Procedure
027H04Z	ICD10	DILATION OF PULMONARY VALVE WITH DRUG-ELUTING INTRALUMINAL DEVICE, OPEN APPROACH	VALVE	Procedure
02NJ0ZZ	ICD10	RELEASE TRICUSPID VALVE, OPEN APPROACH	VALVE	Procedure
027J0ZZ	ICD10	DILATION OF TRICUSPID VALVE, OPEN APPROACH	VALVE	Procedure
027J0DZ	ICD10	DILATION OF TRICUSPID VALVE WITH INTRALUMINAL DEVICE, OPEN APPROACH	VALVE	Procedure
027J04Z	ICD10	DILATION OF TRICUSPID VALVE WITH DRUG-ELUTING INTRALUMINAL DEVICE, OPEN APPROACH	VALVE	Procedure
02RJ4KZ	ICD10	REPLACEMENT OF TRICUSPID VALVE WITH NONAUTOLOGOUS TISSUE SUBSTITUTE, PERCUTANEOUS ENDOSCOPIC APPROACH	VALVE	Procedure
02RJ4JZ	ICD10	REPLACEMENT OF TRICUSPID VALVE WITH SYNTHETIC SUBSTITUTE, PERCUTANEOUS ENDOSCOPIC APPROACH	VALVE	Procedure
02RJ48Z	ICD10	REPLACEMENT OF TRICUSPID VALVE WITH ZOOPLASTIC TISSUE, PERCUTANEOUS ENDOSCOPIC APPROACH	VALVE	Procedure
02RJ47Z	ICD10	REPLACEMENT OF TRICUSPID VALVE WITH AUTOLOGOUS TISSUE SUBSTITUTE, PERCUTANEOUS ENDOSCOPIC APPROACH	VALVE	Procedure
02RJ0KZ	ICD10	REPLACEMENT OF TRICUSPID VALVE WITH NONAUTOLOGOUS TISSUE SUBSTITUTE, OPEN APPROACH	VALVE	Procedure
02RJ0JZ	ICD10	REPLACEMENT OF TRICUSPID VALVE WITH SYNTHETIC SUBSTITUTE, OPEN APPROACH	VALVE	Procedure
02RJ08Z	ICD10	REPLACEMENT OF TRICUSPID VALVE WITH ZOOPLASTIC TISSUE, OPEN APPROACH	VALVE	Procedure
02RJ07Z	ICD10	REPLACEMENT OF TRICUSPID VALVE WITH AUTOLOGOUS TISSUE SUBSTITUTE, OPEN APPROACH	VALVE	Procedure
02RH4KZ	ICD10	REPLACEMENT OF PULMONARY VALVE WITH NONAUTOLOGOUS TISSUE SUBSTITUTE, PERCUTANEOUS ENDOSCOPIC APPROACH	VALVE	Procedure
02RH4JZ	ICD10	REPLACEMENT OF PULMONARY VALVE WITH SYNTHETIC SUBSTITUTE, PERCUTANEOUS ENDOSCOPIC APPROACH	VALVE	Procedure
02RH48Z	ICD10	REPLACEMENT OF PULMONARY VALVE WITH ZOOPLASTIC TISSUE, PERCUTANEOUS ENDOSCOPIC APPROACH	VALVE	Procedure
02RH47Z	ICD10	REPLACEMENT OF PULMONARY VALVE WITH AUTOLOGOUS TISSUE SUBSTITUTE, PERCUTANEOUS ENDOSCOPIC APPROACH	VALVE	Procedure
02RH0KZ	ICD10	REPLACEMENT OF PULMONARY VALVE WITH NONAUTOLOGOUS TISSUE SUBSTITUTE, OPEN APPROACH	VALVE	Procedure
02RH0JZ	ICD10	REPLACEMENT OF PULMONARY VALVE WITH SYNTHETIC SUBSTITUTE, OPEN APPROACH	VALVE	Procedure
02RH08Z	ICD10	REPLACEMENT OF PULMONARY VALVE WITH ZOOPLASTIC TISSUE, OPEN APPROACH	VALVE	Procedure
02RH07Z	ICD10	REPLACEMENT OF PULMONARY VALVE WITH AUTOLOGOUS TISSUE SUBSTITUTE, OPEN APPROACH	VALVE	Procedure
02RG4KZ	ICD10	REPLACEMENT OF MITRAL VALVE WITH NONAUTOLOGOUS TISSUE SUBSTITUTE, PERCUTANEOUS ENDOSCOPIC APPROACH	VALVE	Procedure
02RG4JZ	ICD10	REPLACEMENT OF MITRAL VALVE WITH SYNTHETIC SUBSTITUTE, PERCUTANEOUS ENDOSCOPIC APPROACH	VALVE	Procedure
02RG48Z	ICD10	REPLACEMENT OF MITRAL VALVE WITH ZOOPLASTIC TISSUE, PERCUTANEOUS ENDOSCOPIC APPROACH	VALVE	Procedure
02RG47Z	ICD10	REPLACEMENT OF MITRAL VALVE WITH AUTOLOGOUS TISSUE SUBSTITUTE, PERCUTANEOUS ENDOSCOPIC APPROACH	VALVE	Procedure
02RG0KZ	ICD10	REPLACEMENT OF MITRAL VALVE WITH NONAUTOLOGOUS TISSUE SUBSTITUTE, OPEN APPROACH	VALVE	Procedure
02RG0JZ	ICD10	REPLACEMENT OF MITRAL VALVE WITH SYNTHETIC SUBSTITUTE, OPEN APPROACH	VALVE	Procedure
02RG08Z	ICD10	REPLACEMENT OF MITRAL VALVE WITH ZOOPLASTIC TISSUE, OPEN APPROACH	VALVE	Procedure
02RG07Z	ICD10	REPLACEMENT OF MITRAL VALVE WITH AUTOLOGOUS TISSUE SUBSTITUTE, OPEN APPROACH	VALVE	Procedure
02RF4KZ	ICD10	REPLACEMENT OF AORTIC VALVE WITH NONAUTOLOGOUS TISSUE SUBSTITUTE, PERCUTANEOUS ENDOSCOPIC APPROACH	VALVE	Procedure
02RF4JZ	ICD10	REPLACEMENT OF AORTIC VALVE WITH SYNTHETIC SUBSTITUTE, PERCUTANEOUS ENDOSCOPIC APPROACH	VALVE	Procedure
02RF48Z	ICD10	REPLACEMENT OF AORTIC VALVE WITH ZOOPLASTIC TISSUE, PERCUTANEOUS ENDOSCOPIC APPROACH	VALVE	Procedure
02RF47Z	ICD10	REPLACEMENT OF AORTIC VALVE WITH AUTOLOGOUS TISSUE SUBSTITUTE, PERCUTANEOUS ENDOSCOPIC APPROACH	VALVE	Procedure
02RF0KZ	ICD10	REPLACEMENT OF AORTIC VALVE WITH NONAUTOLOGOUS TISSUE SUBSTITUTE, OPEN APPROACH	VALVE	Procedure
02RF0JZ	ICD10	REPLACEMENT OF AORTIC VALVE WITH SYNTHETIC SUBSTITUTE, OPEN APPROACH	VALVE	Procedure
02RF08Z	ICD10	REPLACEMENT OF AORTIC VALVE WITH ZOOPLASTIC TISSUE, OPEN APPROACH	VALVE	Procedure
02RF07Z	ICD10	REPLACEMENT OF AORTIC VALVE WITH AUTOLOGOUS TISSUE SUBSTITUTE, OPEN APPROACH	VALVE	Procedure
X2RF432	ICD10	REPLACEMENT OF AORTIC VALVE USING ZOOPLASTIC TISSUE, RAPID DEPLOYMENT TECHNIQUE, PERCUTANEOUS ENDOSCOPIC APPROACH, NEW TECHNOLOGY GROUP 2	VALVE	Procedure
X2RF032	ICD10	REPLACEMENT OF AORTIC VALVE USING ZOOPLASTIC TISSUE, RAPID DEPLOYMENT TECHNIQUE, OPEN APPROACH, NEW TECHNOLOGY GROUP 2	VALVE	Procedure
02QD4ZZ	ICD10	REPAIR PAPILLARY MUSCLE, PERCUTANEOUS ENDOSCOPIC APPROACH	VALVE	Procedure
02QD3ZZ	ICD10	REPAIR PAPILLARY MUSCLE, PERCUTANEOUS APPROACH	VALVE	Procedure
02QD0ZZ	ICD10	REPAIR PAPILLARY MUSCLE, OPEN APPROACH	VALVE	Procedure
028D4ZZ	ICD10	DIVISION OF PAPILLARY MUSCLE, PERCUTANEOUS ENDOSCOPIC APPROACH	VALVE	Procedure
028D3ZZ	ICD10	DIVISION OF PAPILLARY MUSCLE, PERCUTANEOUS APPROACH	VALVE	Procedure
028D0ZZ	ICD10	DIVISION OF PAPILLARY MUSCLE, OPEN APPROACH	VALVE	Procedure
02Q94ZZ	ICD10	REPAIR CHORDAE TENDINEAE, PERCUTANEOUS ENDOSCOPIC APPROACH	VALVE	Procedure
02Q93ZZ	ICD10	REPAIR CHORDAE TENDINEAE, PERCUTANEOUS APPROACH	VALVE	Procedure
02Q90ZZ	ICD10	REPAIR CHORDAE TENDINEAE, OPEN APPROACH	VALVE	Procedure
02894ZZ	ICD10	DIVISION OF CHORDAE TENDINEAE, PERCUTANEOUS ENDOSCOPIC APPROACH	VALVE	Procedure
02893ZZ	ICD10	DIVISION OF CHORDAE TENDINEAE, PERCUTANEOUS APPROACH	VALVE	Procedure
02890ZZ	ICD10	DIVISION OF CHORDAE TENDINEAE, OPEN APPROACH	VALVE	Procedure
02QJ4ZZ	ICD10	REPAIR TRICUSPID VALVE, PERCUTANEOUS ENDOSCOPIC APPROACH	VALVE	Procedure
02QJ3ZZ	ICD10	REPAIR TRICUSPID VALVE, PERCUTANEOUS APPROACH	VALVE	Procedure
02QH4ZZ	ICD10	REPAIR PULMONARY VALVE, PERCUTANEOUS ENDOSCOPIC APPROACH	VALVE	Procedure
02QH3ZZ	ICD10	REPAIR PULMONARY VALVE, PERCUTANEOUS APPROACH	VALVE	Procedure
02QG4ZZ	ICD10	REPAIR MITRAL VALVE, PERCUTANEOUS ENDOSCOPIC APPROACH	VALVE	Procedure
02QG3ZZ	ICD10	REPAIR MITRAL VALVE, PERCUTANEOUS APPROACH	VALVE	Procedure
02QF4ZZ	ICD10	REPAIR AORTIC VALVE, PERCUTANEOUS ENDOSCOPIC APPROACH	VALVE	Procedure
02QF3ZZ	ICD10	REPAIR AORTIC VALVE, PERCUTANEOUS APPROACH	VALVE	Procedure
02UG3JZ	ICD10	SUPPLEMENT MITRAL VALVE WITH SYNTHETIC SUBSTITUTE, PERCUTANEOUS APPROACH	VALVE	Procedure
02QJ4ZG	ICD10	REPAIR TRICUSPID VALVE CREATED FROM RIGHT ATRIOVENTRICULAR VALVE, PERCUTANEOUS ENDOSCOPIC APPROACH	VALVE	Procedure
02QJ3ZG	ICD10	REPAIR TRICUSPID VALVE CREATED FROM RIGHT ATRIOVENTRICULAR VALVE, PERCUTANEOUS APPROACH	VALVE	Procedure
02QJ0ZG	ICD10	REPAIR TRICUSPID VALVE CREATED FROM RIGHT ATRIOVENTRICULAR VALVE, OPEN APPROACH	VALVE	Procedure
02QG4ZE	ICD10	REPAIR MITRAL VALVE CREATED FROM LEFT ATRIOVENTRICULAR VALVE, PERCUTANEOUS ENDOSCOPIC APPROACH	VALVE	Procedure
02QG3ZE	ICD10	REPAIR MITRAL VALVE CREATED FROM LEFT ATRIOVENTRICULAR VALVE, PERCUTANEOUS APPROACH	VALVE	Procedure
02QG0ZE	ICD10	REPAIR MITRAL VALVE CREATED FROM LEFT ATRIOVENTRICULAR VALVE, OPEN APPROACH	VALVE	Procedure
02QF4ZJ	ICD10	REPAIR AORTIC VALVE CREATED FROM TRUNCAL VALVE, PERCUTANEOUS ENDOSCOPIC APPROACH	VALVE	Procedure
02QF3ZJ	ICD10	REPAIR AORTIC VALVE CREATED FROM TRUNCAL VALVE, PERCUTANEOUS APPROACH	VALVE	Procedure
02QF0ZJ	ICD10	REPAIR AORTIC VALVE CREATED FROM TRUNCAL VALVE, OPEN APPROACH	VALVE	Procedure
All procedures in this section REQUIRE the presence of ONE of the codes listed in 'Additional_inclusion' below during the same visit to qualify
CODE	TYPE	DESCRIPTION	Surgical Category	CODE_TYPE
35.00	ICD9	CLOSED HEART VALVOTOMY, UNSPECIFIED VALVE	VALVE	Procedure
35.03	ICD9	CLOSED HEART VALVOTOMY, PULMONARY VALVE	VALVE	Procedure
35.02	ICD9	CLOSED HEART VALVOTOMY, MITRAL VALVE	VALVE	Procedure
35.01	ICD9	CLOSED HEART VALVOTOMY, AORTIC VALVE	VALVE	Procedure
35.04	ICD9	CLOSED HEART VALVOTOMY, TRICUSPID VALVE	VALVE	Procedure
33496	CPT	Repair of non-structural prosthetic valve dysfunction with cardiopulmonary bypass (separate procedure)	VALVE	Procedure
02NJ4ZZ	ICD10	RELEASE TRICUSPID VALVE, PERCUTANEOUS ENDOSCOPIC APPROACH	VALVE	Procedure
02NJ3ZZ	ICD10	RELEASE TRICUSPID VALVE, PERCUTANEOUS APPROACH	VALVE	Procedure
02NH4ZZ	ICD10	RELEASE PULMONARY VALVE, PERCUTANEOUS ENDOSCOPIC APPROACH	VALVE	Procedure
02NH3ZZ	ICD10	RELEASE PULMONARY VALVE, PERCUTANEOUS APPROACH	VALVE	Procedure
02NG4ZZ	ICD10	RELEASE MITRAL VALVE, PERCUTANEOUS ENDOSCOPIC APPROACH	VALVE	Procedure
02NG3ZZ	ICD10	RELEASE MITRAL VALVE, PERCUTANEOUS APPROACH	VALVE	Procedure
02NF4ZZ	ICD10	RELEASE AORTIC VALVE, PERCUTANEOUS ENDOSCOPIC APPROACH	VALVE	Procedure
02NF3ZZ	ICD10	RELEASE AORTIC VALVE, PERCUTANEOUS APPROACH	VALVE	Procedure
Additional_inclusion
CODE	TYPE	DESCRIPTION	Surgical Category	CODE_TYPE
39.61	ICD9	EXTRACORPOREAL CIRCULATION AUXILIARY TO OPEN HEART SURGERY	N/A	Procedure
33405	CPT	Replacement, aortic valve, with cardiopulmonary bypass; with prosthetic valve, other than homograft or stentless valve	N/A	Procedure
33406	CPT	Replacement, aortic valve, with cardiopulmonary bypass; with allograft valve (freehand)	N/A	Procedure
33410	CPT	Replacement, aortic valve, with cardiopulmonary bypass; with stentless tissue valve	N/A	Procedure
33422	CPT	Valvotomy, mitral valve; open heart, with cardiopulmonary bypass	N/A	Procedure
33430	CPT	Replacement, mitral valve, with cardiopulmonary bypass	N/A	Procedure
33460	CPT	Valvectomy, tricuspid valve, with cardiopulmonary bypass	N/A	Procedure
33465	CPT	Replacement, tricuspid valve, with cardiopulmonary bypass	N/A	Procedure
33474	CPT	Valvotomy, pulmonary valve, open heart, with cardiopulmonary bypass	N/A	Procedure
33403	CPT	Valvuloplasty, aortic valve; using transventricular dilation, with cardiopulmonary bypass	N/A	Procedure
33425	CPT	Valvuloplasty, mitral valve, with cardiopulmonary bypass;	N/A	Procedure
33426	CPT	Valvuloplasty, mitral valve, with cardiopulmonary bypass; with prosthetic ring	N/A	Procedure
33427	CPT	Valvuloplasty, mitral valve, with cardiopulmonary bypass; radical reconstruction, with or without ring	N/A	Procedure
33120	CPT	Excision of intracardiac tumor, resection with cardiopulmonary bypass	N/A	Procedure
33305	CPT	Repair of cardiac wound; with cardiopulmonary bypass	N/A	Procedure
33315	CPT	Cardiotomy, exploratory (includes removal of foreign body, atrial or ventricular thrombus); with cardiopulmonary bypass	N/A	Procedure
33322	CPT	Suture repair of aorta or great vessels; with cardiopulmonary bypass	N/A	Procedure
33335	CPT	Insertion of graft, aorta or great vessels; with cardiopulmonary bypass	N/A	Procedure
33500	CPT	Repair of coronary arteriovenous or arteriocardiac chamber fistula; with cardiopulmonary bypass	N/A	Procedure
33504	CPT	Repair of anomalous coronary artery from pulmonary artery origin; by graft, with cardiopulmonary bypass	N/A	Procedure
33641	CPT	Repair atrial septal defect, secundum, with cardiopulmonary bypass, with or without patch	N/A	Procedure
33702	CPT	Repair sinus of Valsalva fistula, with cardiopulmonary bypass;	N/A	Procedure
33710	CPT	Repair sinus of Valsalva fistula, with cardiopulmonary bypass; with repair of ventricular septal defect	N/A	Procedure
33720	CPT	Repair sinus of Valsalva aneurysm, with cardiopulmonary bypass	N/A	Procedure
33736	CPT	Atrial septectomy or septostomy; open heart with cardiopulmonary bypass	N/A	Procedure
33814	CPT	Obliteration of aortopulmonary septal defect; with cardiopulmonary bypass	N/A	Procedure
33853	CPT	Repair of hypoplastic or interrupted aortic arch using autogenous or prosthetic material; with cardiopulmonary bypass	N/A	Procedure
33860	CPT	Ascending aorta graft, with cardiopulmonary bypass, includes valve suspension, when performed	N/A	Procedure
33864	CPT	Ascending aorta graft, with cardiopulmonary bypass with valve suspension, with coronary reconstruction and valve-sparing aortic root remodeling (eg, David Procedure, Yacoub Procedure)	N/A	Procedure
33870	CPT	Transverse arch graft, with cardiopulmonary bypass	N/A	Procedure
33910	CPT	Pulmonary artery embolectomy; with cardiopulmonary bypass	N/A	Procedure
33916	CPT	Pulmonary endarterectomy, with or without embolectomy, with cardiopulmonary bypass	N/A	Procedure
33922	CPT	Transection of pulmonary artery with cardiopulmonary bypass	N/A	Procedure
33926	CPT	Repair of pulmonary artery arborization anomalies by unifocalization; with cardiopulmonary bypass	N/A	Procedure
33960	CPT	Prolonged extracorporeal circulation for cardiopulmonary insufficiency; initial day	N/A	Procedure
33961	CPT	Prolonged extracorporeal circulation for cardiopulmonary insufficiency; each subsequent day	N/A	Procedure
36822	CPT	Insertion of cannula(s) for prolonged extracorporeal circulation for cardiopulmonary insufficiency (ECMO)	N/A	Procedure
5A1221Z	ICD10	PERFORMANCE OF CARDIAC OUTPUT, CONTINUOUS	N/A	Procedure

## Sheet: Table B
Code	Type	Description	CODE_TYPE
428.0	ICD9	CONGESTIVE HEART FAILURE, UNSPECIFIED	Diagnosis
428.1	ICD9	LEFT HEART FAILURE	Diagnosis
428.9	ICD9	HEART FAILURE, UNSPECIFIED	Diagnosis
428.20	ICD9	UNSPECIFIED SYSTOLIC HEART FAILURE	Diagnosis
428.21	ICD9	ACUTE SYSTOLIC HEART FAILURE	Diagnosis
428.23	ICD9	ACUTE ON CHRONIC SYSTOLIC HEART FAILURE	Diagnosis
428.30	ICD9	UNSPECIFIED DIASTOLIC HEART FAILURE	Diagnosis
428.31	ICD9	ACUTE DIASTOLIC HEART FAILURE	Diagnosis
428.33	ICD9	ACUTE ON CHRONIC DIASTOLIC HEART FAILURE	Diagnosis
428.40	ICD9	UNSPECIFIED COMBINED SYSTOLIC AND DIASTOLIC HEART FAILURE	Diagnosis
428.41	ICD9	ACUTE COMBINED SYSTOLIC AND DIASTOLIC HEART FAILURE	Diagnosis
428.43	ICD9	ACUTE ON CHRONIC COMBINED SYSTOLIC AND DIASTOLIC HEART FAILURE	Diagnosis
I50.9	ICD10	HEART FAILURE, UNSPECIFIED	Diagnosis
I50.1	ICD10	LEFT VENTRICULAR FAILURE	Diagnosis
I50.20	ICD10	UNSPECIFIED SYSTOLIC (CONGESTIVE) HEART FAILURE	Diagnosis
I50.21	ICD10	ACUTE SYSTOLIC (CONGESTIVE) HEART FAILURE	Diagnosis
I50.23	ICD10	ACUTE ON CHRONIC SYSTOLIC (CONGESTIVE) HEART FAILURE	Diagnosis
I50.30	ICD10	UNSPECIFIED DIASTOLIC (CONGESTIVE) HEART FAILURE	Diagnosis
I50.31	ICD10	ACUTE DIASTOLIC (CONGESTIVE) HEART FAILURE	Diagnosis
I50.33	ICD10	ACUTE ON CHRONIC DIASTOLIC (CONGESTIVE) HEART FAILURE	Diagnosis
I50.40	ICD10	UNSPECIFIED COMBINED SYSTOLIC (CONGESTIVE) AND DIASTOLIC (CONGESTIVE) HEART FAILURE	Diagnosis
I50.41	ICD10	ACUTE COMBINED SYSTOLIC (CONGESTIVE) AND DIASTOLIC (CONGESTIVE) HEART FAILURE	Diagnosis
I50.43	ICD10	ACUTE ON CHRONIC COMBINED SYSTOLIC (CONGESTIVE) AND DIASTOLIC (CONGESTIVE) HEART FAILURE	Diagnosis

## Sheet: Table C
CODE	TYPE	DESCRIPTION	CODE_TYPE
518.5	ICD9	PULMONARY INSUFFICIENCY FOLLOWING TRAUMA AND SURGERY	Diagnosis
518.82	ICD9	OTHER PULMONARY INSUFFICIENCY, NOT ELSEWHERE CLASSIFIED	Diagnosis
518.4	ICD9	ACUTE EDEMA OF LUNG, UNSPECIFIED	Diagnosis
518.81	ICD9	ACUTE RESPIRATORY FAILURE	Diagnosis
518.51	ICD9	ACUTE RESPIRATORY FAILURE FOLLOWING TRAUMA AND SURGERY	Diagnosis
518.52	ICD9	OTHER PULMONARY INSUFFICIENCY, NOT ELSEWHERE CLASSIFIED, FOLLOWING TRAUMA AND SURGERY	Diagnosis
518.53	ICD9	ACUTE AND CHRONIC RESPIRATORY FAILURE FOLLOWING TRAUMA AND SURGERY	Diagnosis
J80	ICD10	ACUTE RESPIRATORY DISTRESS SYNDROME	Diagnosis
J81.0	ICD10	ACUTE PULMONARY EDEMA	Diagnosis
J96.90	ICD10	RESPIRATORY FAILURE, UNSPECIFIED, UNSPECIFIED WHETHER WITH HYPOXIA OR HYPERCAPNIA	Diagnosis
J96.00	ICD10	ACUTE RESPIRATORY FAILURE, UNSPECIFIED WHETHER WITH HYPOXIA OR HYPERCAPNIA	Diagnosis
J95.821	ICD10	ACUTE POSTPROCEDURAL RESPIRATORY FAILURE	Diagnosis
J95.3	ICD10	CHRONIC PULMONARY INSUFFICIENCY FOLLOWING SURGERY	Diagnosis
J95.2	ICD10	ACUTE PULMONARY INSUFFICIENCY FOLLOWING NONTHORACIC SURGERY	Diagnosis
J95.1	ICD10	ACUTE PULMONARY INSUFFICIENCY FOLLOWING THORACIC SURGERY	Diagnosis
J96.20	ICD10	ACUTE AND CHRONIC RESPIRATORY FAILURE, UNSPECIFIED WHETHER WITH HYPOXIA OR HYPERCAPNIA	Diagnosis
J95.822	ICD10	ACUTE AND CHRONIC POSTPROCEDURAL RESPIRATORY FAILURE	Diagnosis
96.04	ICD9	INSERTION OF ENDOTRACHEAL TUBE	Procedure
96.70	ICD9	CONTINUOUS INVASIVE MECHANICAL VENTILATION OF UNSPECIFIED DURATION	Procedure
96.71	ICD9	CONTINUOUS INVASIVE MECHANICAL VENTILATION FOR LESS THAN 96 CONSECUTIVE HOURS	Procedure
96.72	ICD9	CONTINUOUS INVASIVE MECHANICAL VENTILATION FOR 96 CONSECUTIVE HOURS OR MORE	Procedure
0BH17EZ	ICD10	INSERTION OF ENDOTRACHEAL AIRWAY INTO TRACHEA, VIA NATURAL OR ARTIFICIAL OPENING	Procedure
0BH18EZ	ICD10	INSERTION OF ENDOTRACHEAL AIRWAY INTO TRACHEA, VIA NATURAL OR ARTIFICIAL OPENING ENDOSCOPIC	Procedure
5A1955Z	ICD10	RESPIRATORY VENTILATION, GREATER THAN 96 CONSECUTIVE HOURS	Procedure
5A1945Z	ICD10	RESPIRATORY VENTILATION, 24-96 CONSECUTIVE HOURS	Procedure
5A1935Z	ICD10	RESPIRATORY VENTILATION, LESS THAN 24 CONSECUTIVE HOURS	Procedure

## Sheet: Table D
Code	Type	Description	CODE_TYPE
428.23	ICD9	ACUTE ON CHRONIC SYSTOLIC HEART FAILURE	Diagnosis
428.33	ICD9	ACUTE ON CHRONIC DIASTOLIC HEART FAILURE	Diagnosis
428.43	ICD9	ACUTE ON CHRONIC COMBINED SYSTOLIC AND DIASTOLIC HEART FAILURE	Diagnosis
I50.23	ICD10	ACUTE ON CHRONIC SYSTOLIC (CONGESTIVE) HEART FAILURE	Diagnosis
I50.33	ICD10	ACUTE ON CHRONIC DIASTOLIC (CONGESTIVE) HEART FAILURE	Diagnosis
I50.43	ICD10	ACUTE ON CHRONIC COMBINED SYSTOLIC (CONGESTIVE) AND DIASTOLIC (CONGESTIVE) HEART FAILURE	Diagnosis

## Sheet: Table E
Code	Type	Description	CODE_TYPE
428.1	ICD9	LEFT HEART FAILURE	Diagnosis
398.91	ICD9	RHEUMATIC HEART FAILURE (CONGESTIVE)	Diagnosis
428.0	ICD9	CONGESTIVE HEART FAILURE, UNSPECIFIED	Diagnosis
428.9	ICD9	HEART FAILURE, UNSPECIFIED	Diagnosis
428.20	ICD9	UNSPECIFIED SYSTOLIC HEART FAILURE	Diagnosis
428.21	ICD9	ACUTE SYSTOLIC HEART FAILURE	Diagnosis
428.22	ICD9	CHRONIC SYSTOLIC HEART FAILURE	Diagnosis
428.23	ICD9	ACUTE ON CHRONIC SYSTOLIC HEART FAILURE	Diagnosis
428.30	ICD9	UNSPECIFIED DIASTOLIC HEART FAILURE	Diagnosis
428.31	ICD9	ACUTE DIASTOLIC HEART FAILURE	Diagnosis
428.32	ICD9	CHRONIC DIASTOLIC HEART FAILURE	Diagnosis
428.33	ICD9	ACUTE ON CHRONIC DIASTOLIC HEART FAILURE	Diagnosis
428.40	ICD9	UNSPECIFIED COMBINED SYSTOLIC AND DIASTOLIC HEART FAILURE	Diagnosis
428.41	ICD9	ACUTE COMBINED SYSTOLIC AND DIASTOLIC HEART FAILURE	Diagnosis
428.42	ICD9	CHRONIC COMBINED SYSTOLIC AND DIASTOLIC HEART FAILURE	Diagnosis
428.43	ICD9	ACUTE ON CHRONIC COMBINED SYSTOLIC AND DIASTOLIC HEART FAILURE	Diagnosis
I50.1	ICD10	LEFT VENTRICULAR FAILURE	Diagnosis
I09.81	ICD10	RHEUMATIC HEART FAILURE	Diagnosis
I50.9	ICD10	HEART FAILURE, UNSPECIFIED	Diagnosis
I50.20	ICD10	UNSPECIFIED SYSTOLIC (CONGESTIVE) HEART FAILURE	Diagnosis
I50.21	ICD10	ACUTE SYSTOLIC (CONGESTIVE) HEART FAILURE	Diagnosis
I50.22	ICD10	CHRONIC SYSTOLIC (CONGESTIVE) HEART FAILURE	Diagnosis
I50.23	ICD10	ACUTE ON CHRONIC SYSTOLIC (CONGESTIVE) HEART FAILURE	Diagnosis
I50.30	ICD10	UNSPECIFIED DIASTOLIC (CONGESTIVE) HEART FAILURE	Diagnosis
I50.31	ICD10	ACUTE DIASTOLIC (CONGESTIVE) HEART FAILURE	Diagnosis
I50.32	ICD10	CHRONIC DIASTOLIC (CONGESTIVE) HEART FAILURE	Diagnosis
I50.33	ICD10	ACUTE ON CHRONIC DIASTOLIC (CONGESTIVE) HEART FAILURE	Diagnosis
I50.40	ICD10	UNSPECIFIED COMBINED SYSTOLIC (CONGESTIVE) AND DIASTOLIC (CONGESTIVE) HEART FAILURE	Diagnosis
I50.41	ICD10	ACUTE COMBINED SYSTOLIC (CONGESTIVE) AND DIASTOLIC (CONGESTIVE) HEART FAILURE	Diagnosis
I50.42	ICD10	CHRONIC COMBINED SYSTOLIC (CONGESTIVE) AND DIASTOLIC (CONGESTIVE) HEART FAILURE	Diagnosis
I50.43	ICD10	ACUTE ON CHRONIC COMBINED SYSTOLIC (CONGESTIVE) AND DIASTOLIC (CONGESTIVE) HEART FAILURE	Diagnosis

## Sheet: Table F
CODE	TYPE	DESCRIPTION	CODE_TYPE
517.3	ICD9	ACUTE CHEST SYNDROME	Diagnosis
518.5	ICD9	PULMONARY INSUFFICIENCY FOLLOWING TRAUMA AND SURGERY	Diagnosis
518.51	ICD9	ACUTE RESPIRATORY FAILURE FOLLOWING TRAUMA AND SURGERY	Diagnosis
518.52	ICD9	OTHER PULMONARY INSUFFICIENCY, NOT ELSEWHERE CLASSIFIED, FOLLOWING TRAUMA AND SURGERY	Diagnosis
518.53	ICD9	ACUTE AND CHRONIC RESPIRATORY FAILURE FOLLOWING TRAUMA AND SURGERY	Diagnosis
518.81	ICD9	ACUTE RESPIRATORY FAILURE	Diagnosis
518.82	ICD9	OTHER PULMONARY INSUFFICIENCY, NOT ELSEWHERE CLASSIFIED	Diagnosis
518.83	ICD9	CHRONIC RESPIRATORY FAILURE	Diagnosis
518.84	ICD9	ACUTE AND CHRONIC RESPIRATORY FAILURE	Diagnosis
799.1	ICD9	RESPIRATORY ARREST	Diagnosis
V46.1	ICD9	DEPENDENCE ON RESPIRATOR [VENTILATOR]	Diagnosis
V46.11	ICD9	DEPENDENCE ON RESPIRATOR [VENTILATOR], STATUS	Diagnosis
V46.12	ICD9	ENCOUNTER FOR RESPIRATOR [VENTILATOR] DEPENDENCE DURING POWER FAILURE	Diagnosis
V46.13	ICD9	ENCOUNTER FOR WEANING FROM RESPIRATOR [VENTILATOR]	Diagnosis
V46.14	ICD9	MECHANICAL COMPLICATION OF RESPIRATOR [VENTILATOR]	Diagnosis
V46.2	ICD9	OTHER DEPENDENCE ON MACHINES, SUPPLEMENTAL OXYGEN	Diagnosis
490	ICD9	BRONCHITIS, NOT SPECIFIED AS ACUTE OR CHRONIC	Diagnosis
491	ICD9	CHRONIC BRONCHITIS	Diagnosis
491.0	ICD9	SIMPLE CHRONIC BRONCHITIS	Diagnosis
491.1	ICD9	MUCOPURULENT CHRONIC BRONCHITIS	Diagnosis
491.8	ICD9	OTHER CHRONIC BRONCHITIS	Diagnosis
491.9	ICD9	UNSPECIFIED CHRONIC BRONCHITIS	Diagnosis
J99	ICD10	RESPIRATORY DISORDERS IN DISEASES CLASSIFIED ELSEWHERE	Diagnosis
J96.00	ICD10	ACUTE RESPIRATORY FAILURE, UNSPECIFIED WHETHER WITH HYPOXIA OR HYPERCAPNIA	Diagnosis
J95.821	ICD10	ACUTE POSTPROCEDURAL RESPIRATORY FAILURE	Diagnosis
J95.3	ICD10	CHRONIC PULMONARY INSUFFICIENCY FOLLOWING SURGERY	Diagnosis
J95.2	ICD10	ACUTE PULMONARY INSUFFICIENCY FOLLOWING NONTHORACIC SURGERY	Diagnosis
J95.1	ICD10	ACUTE PULMONARY INSUFFICIENCY FOLLOWING THORACIC SURGERY	Diagnosis
J96.20	ICD10	ACUTE AND CHRONIC RESPIRATORY FAILURE, UNSPECIFIED WHETHER WITH HYPOXIA OR HYPERCAPNIA	Diagnosis
J95.822	ICD10	ACUTE AND CHRONIC POSTPROCEDURAL RESPIRATORY FAILURE	Diagnosis
J96.90	ICD10	RESPIRATORY FAILURE, UNSPECIFIED, UNSPECIFIED WHETHER WITH HYPOXIA OR HYPERCAPNIA	Diagnosis
J80	ICD10	ACUTE RESPIRATORY DISTRESS SYNDROME	Diagnosis
J96.10	ICD10	CHRONIC RESPIRATORY FAILURE, UNSPECIFIED WHETHER WITH HYPOXIA OR HYPERCAPNIA	Diagnosis
R09.2	ICD10	RESPIRATORY ARREST	Diagnosis
Z99.11	ICD10	DEPENDENCE ON RESPIRATOR [VENTILATOR] STATUS	Diagnosis
Z99.12	ICD10	ENCOUNTER FOR RESPIRATOR [VENTILATOR] DEPENDENCE DURING POWER FAILURE	Diagnosis
J95.850	ICD10	MECHANICAL COMPLICATION OF RESPIRATOR	Diagnosis
Z99.81	ICD10	DEPENDENCE ON SUPPLEMENTAL OXYGEN	Diagnosis
J96.0	ICD10	ACUTE RESPIRATORY FAILURE	Diagnosis
J96.01	ICD10	ACUTE RESPIRATORY FAILURE WITH HYPOXIA	Diagnosis
J96.02	ICD10	ACUTE RESPIRATORY FAILURE WITH HYPERCAPNIA	Diagnosis
J96.11	ICD10	CHRONIC RESPIRATORY FAILURE WITH HYPOXIA	Diagnosis
J96.12	ICD10	CHRONIC RESPIRATORY FAILURE WITH HYPERCAPNIA	Diagnosis
J96.21	ICD10	ACUTE AND CHRONIC RESPIRATORY FAILURE WITH HYPOXIA	Diagnosis
J96.22	ICD10	ACUTE AND CHRONIC RESPIRATORY FAILURE WITH HYPERCAPNIA	Diagnosis
J96.91	ICD10	RESPIRATORY FAILURE, UNSPECIFIED WITH HYPOXIA	Diagnosis
J96.92	ICD10	RESPIRATORY FAILURE, UNSPECIFIED WITH HYPERCAPNIA	Diagnosis
J40	ICD10	BRONCHITIS, NOT SPECIFIED AS ACUTE OR CHRONIC	Diagnosis
J41	ICD10	SIMPLE AND MUCOPURULENT CHRONIC BRONCHITIS	Diagnosis
J41.0	ICD10	SIMPLE CHRONIC BRONCHITIS	Diagnosis
J41.1	ICD10	MUCOPURULENT CHRONIC BRONCHITIS	Diagnosis
J41.8	ICD10	MIXED SIMPLE AND MUCOPURULENT CHRONIC BRONCHITIS	Diagnosis
J42	ICD10	UNSPECIFIED CHRONIC BRONCHITIS	Diagnosis
96.72	ICD9	CONTINUOUS INVASIVE MECHANICAL VENTILATION FOR 96 CONSECUTIVE HOURS OR MORE	Procedure
5A1955Z	ICD10	RESPIRATORY VENTILATION, GREATER THAN 96 CONSECUTIVE HOURS	Procedure
5A09557	ICD10	ASSISTANCE WITH RESPIRATORY VENTILATION, GREATER THAN 96 CONSECUTIVE HOURS, CONTINUOUS POSITIVE AIRWAY PRESSURE	Procedure
5A0955Z	ICD10	ASSISTANCE WITH RESPIRATORY VENTILATION, GREATER THAN 96 CONSECUTIVE HOURS	Procedure
5A09558	ICD10	ASSISTANCE WITH RESPIRATORY VENTILATION, GREATER THAN 96 CONSECUTIVE HOURS, INTERMITTENT POSITIVE AIRWAY PRESSURE	Procedure
5A0955B	ICD10	ASSISTANCE WITH RESPIRATORY VENTILATION, GREATER THAN 96 CONSECUTIVE HOURS, INTERMITTENT NEGATIVE AIRWAY PRESSURE	Procedure
5A09559	ICD10	ASSISTANCE WITH RESPIRATORY VENTILATION, GREATER THAN 96 CONSECUTIVE HOURS, CONTINUOUS NEGATIVE AIRWAY PRESSURE	Procedure
94002	CPT	Ventilation assist and management, initiation of pressure or volume preset ventilators for assisted or controlled breathing; hospital inpatient/observation, initial day	Procedure
94003	CPT	Ventilation assist and management, initiation of pressure or volume preset ventilators for assisted or controlled breathing; hospital inpatient/observation, each subsequent day	Procedure
94004	CPT	Ventilation assist and management, initiation of pressure or volume preset ventilators for assisted or controlled breathing; nursing facility, per day	Procedure
94656	CPT	Ventilation assist and management, initiation of pressure or volume preset ventilators for assisted or controlled breathing; first day	Procedure
94657	CPT	Ventilation assist and management, initiation of pressure or volume preset ventilators for assisted or controlled breathing; subsequent days	Procedure
99504	CPT	Home visit for mechanical ventilation care	Procedure

## Sheet: Table G
Code	Type	Description	CODE_TYPE
491.2	ICD9	Obstructive Chronic Bronchitis	Diagnosis
491.20	ICD9	Obstructive chronic bronchitis, without exacerbation	Diagnosis
491.21	ICD9	Obstructive chronic bronchitis with (acute) exacerbation	Diagnosis
491.22	ICD9	Obstructive chronic bronchitis with acute bronchitis	Diagnosis
492	ICD9	Emphysema	Diagnosis
492.0	ICD9	Emphysematous Bleb	Diagnosis
492.8	ICD9	Other Emphysema	Diagnosis
496	ICD9	Chronic Airway Obstruction, Not elsewhere classified	Diagnosis
J44	ICD10	Other chronic obstructive pulmonary disease	Diagnosis
J44.0	ICD10	Chronic obstructive pulmonary disease with acute lower respiratory infection	Diagnosis
J44.1	ICD10	Chronic obstructive pulmonary disease with (acute) exacerbation	Diagnosis
J44.9	ICD10	Chronic obstructive pulmonary disease, unspecified	Diagnosis
J43	ICD10	Emphysema	Diagnosis
J43.0	ICD10	Unilateral pulmonary emphysema [MacLeod's syndrome]	Diagnosis
J43.1	ICD10	Panlobular emphysema	Diagnosis
J43.2	ICD10	Centrilobular emphysema	Diagnosis
J43.8	ICD10	Other emphysema	Diagnosis
J43.9	ICD10	Emphysema, unspecified	Diagnosis
